# 1 **EoRNA, a barley gene and transcript abundance database.**

2

3 Linda Milne<sup>1</sup>, Micha Bayer<sup>1</sup>, Paulo Rapazote-Flores<sup>1</sup>, Claus-Dieter Mayer<sup>2</sup>, Robbie Waugh<sup>3,4,5</sup>,  
4 Craig G Simpson<sup>3\*</sup>.

5

6 1. Information and Computational Sciences, James Hutton Institute, Invergowrie, Dundee DD2  
7 5DA, UK.

8 2. Biomathematics and Statistics Scotland, Aberdeen, AB25 2ZD, UK.

9 3. Cell and Molecular Sciences, The James Hutton Institute, Invergowrie, Dundee DD2 5DA,  
10 UK.

11 4. Division of Plant Sciences, School of Life Sciences, University of Dundee at the James  
12 Hutton Institute, Dundee DD2 5DA, UK.

13 5. School of Agriculture and Wine & Waite Research Institute, University of Adelaide, Waite  
14 Campus, Glen Osmond, SA, 5064, Australia

15

## 16 **\* Corresponding Author**

17 Dr. Craig G Simpson, Cell and Molecular Sciences, The James Hutton Institute, Invergowrie,  
18 Dundee, DD2 5DA, UK. Tel: +44 1382 568774; E-mail: [craig.simpson@hutton.ac.uk](mailto:craig.simpson@hutton.ac.uk)

19

20 **Running title:** Barley Reference Transcriptome

21

22 **Keywords:** Barley, Reference Transcript Dataset, Transcriptome, Differential gene expression,  
23 Differential alternative splicing

24

25 **Manuscript Type: Data Descriptor**

26

## 27 **Abstract**

28 A high-quality, barley gene reference transcript dataset (BaRTv1.0), was used to quantify gene  
29 and transcript abundances from 22 RNA-seq experiments, covering 843 separate samples.  
30 Using the abundance data we developed a Barley Expression Database (EoRNA\* – Expression  
31 of RNA) to underpin a visualisation tool that displays comparative gene and transcript  
32 abundance data on demand as transcripts per million (TPM) across all samples and all the genes.  
33 EoRNA provides gene and transcript models for all of the transcripts contained in BaRTv1.0,  
34 and these can be conveniently identified through either BaRT or HORVU gene names, or by  
35 direct BLAST of query sequences. Browsing the quantification data reveals cultivar, tissue and  
36 condition specific gene expression and shows changes in the proportions of individual  
37 transcripts that have arisen via alternative splicing. TPM values can be easily extracted to allow  
38 users to determine the statistical significance of observed transcript abundance variation among  
39 samples or perform meta analyses on multiple RNA-seq experiments. \* Eòrna is the Scottish  
40 Gaelic word for Barley

41

## 42 **Background & Summary**

43 Barley is one our earliest domesticated crops and is used for food and processed as malt to  
44 produce beer and spirits. It is a widely studied crop model with abundant genetic resources that  
45 include diverse natural cultivated, wild and landrace collections, experimentally constructed  
46 populations, introgression and mutant lines. Its robust diploid genetics are supported by  
47 numerous high-resolution linkage maps and fully sequenced reference and pan-genome  
48 sequences (1, 2, 3, 4, 5). Genomic diversity has contributed to barley being grown worldwide,  
49 producing harvestable yields under a broad range of environmental conditions and climates (1,  
50 4, 6). As a direct consequence, variation in gene expression contributes implicitly to its adaptive

51 response. Plant gene expression constantly changes throughout the day, throughout plant  
52 development and responds to changing environmental conditions, providing a mechanism for  
53 different genotypes to react and adapt to both transient and chronic stresses (For example, 7, 8,  
54 9, 10, 11, 12, 13).

55 Although the responses of individual genes to specific genetic, biological or environmental  
56 interventions are frequently described, whole transcriptome responses over multiple growth  
57 stages and conditions, and consequently the network of genes and transcripts involved in these  
58 responses, are largely unknown. As growth, morphology and physiology vary substantially  
59 among barley genotypes, either when individual genotypes are grown under different conditions  
60 or when different genotypes are grown under identical conditions, their transcriptomes reveal a  
61 landscape that is highly dynamic, adaptable and unique to the applied conditions (14, 15). This  
62 is not simply the product of the regulation of gene expression at the level of transcription.  
63 Differentially abundant precursor messenger RNAs (pre-mRNAs) may be further subjected to  
64 alternative splice site selection, forming an assembly of specific transcript isoforms. (12, 13,  
65 16, 17, 18). The cellular transcriptome is therefore comprised of transcripts derived from a  
66 combination of both transcriptional and post-transcriptional processes.

67 A high confidence barley reference transcript dataset (BaRTv1.0) represented by 60,444 gene  
68 models and 177,240 transcript sequences are provided in a database  
69 (<https://ics.hutton.ac.uk/barleyrtd/index.html>) that positions the transcripts on the barley cv.  
70 Morex reference genome version 1 (19). The database is fully searchable using either BaRT or  
71 HORVU gene names from the Barley cv Morex pseudomolecules, by key word annotation or  
72 by BLAST sequence searches. The database provides best BLAST homologies of the longest  
73 transcript to Arabidopsis, rice and Brachypodium, and provides links to GO annotations and  
74 GO enrichment studies. The BaRTv1.0 reference transcript dataset (RTD) enables rapid and  
75 precise quantification using non-alignment bioinformatic tools such as Kallisto and Salmon  
76 from short-read RNA-seq data (20, 21). Levels of expression from these tools are measured in  
77 Transcripts per million (TPM) for a given BaRTv1.0 transcript (22).

78 In summary, to highlight the utility of the barley RTD coupled to transcript quantification with  
79 Salmon, we quantified gene and transcript abundances from 22 separate RNA-seq studies,  
80 covering 843 samples from a broad range of different tissues, conditions and genotypes. Our  
81 aim was to allow rapid and intuitive access to the transcript quantification values of each of  
82 these RNA-seq studies without considering any experimental batch, sample or study variation  
83 and without making any statement about significant changes in gene expression across the  
84 different studies. We make the resource available to the community via the EoRNA database  
85 web site (<https://ics.hutton.ac.uk/eorna/index.html>) to simplify and accelerate exploration of the  
86 abundance of target transcripts from individual or groups of genes. The numerical TPM data  
87 can be downloaded for further expression analysis or for meta-analysis of barley RNA-seq  
88 datasets to support investigations into transcriptional responses among tissues/organs or as a  
89 result of different interventions, allowing the identification of genes and transcripts commonly  
90 expressed across multiple studies (23, 24, 25, 26). Intuitive transcript abundance plots  
91 graphically illustrate tissue and condition specific gene expression and alternative splicing.

92

## 93 **Methods**

### 94 **Selected RNA-seq datasets and data processing.**

95 A total of 22 publicly available RNA-seq datasets consisting of 843 samples including replicates  
96 were downloaded from NCBI - Sequence Read Archive database  
97 (<https://www.ncbi.nlm.nih.gov/sra/>) to quantify against the barley RTD (BaRTv1.0)  
98 (Supplementary Table S1). All datasets were produced using Illumina platforms and were  
99 selected with mostly >90 bp and paired-end reads with a quality of  $q \geq 20$ . All raw data were  
100 processed using Trimmomatic-0.30 (27) using default settings to preserve a minimum Phred

101 score of Q20 over 60 bp. One of the samples (NOD1) was over-represented with respect to read  
102 numbers due to a repeat run being necessary and was therefore subsampled to 60 million reads.  
103 Read quality checks before and after trimming were performed using FastQC (fastqc\_v0.11.5)  
104 (<https://www.bioinformatics.babraham.ac.uk/projects/fastqc/>).

105

### 106 **Generation of the EoRNA database**

107 A database and website front-end were constructed to allow easy access to BaRTv1.0 transcripts  
108 and expression analyses using the LAMP configuration (Linux, Apache, MySQL, and Perl).  
109 Additional annotation was added to the transcripts by homology searching against the predicted  
110 peptides from rice (rice pseudo-peptides v 6.0; (28)) and from Arabidopsis thaliana (TAIR  
111 pseudo-peptides v 10, The Arabidopsis Information Resource) using BLASTX at an e-value  
112 cutoff of less than 1e-50 (29). The website <https://ics.hutton.ac.uk/eorna/index.html> allows  
113 users to interrogate data through an entry point via three methods: (i) a BLAST search of the  
114 reference barley assembly or the predicted transcripts; (ii) a keyword search of the derived rice  
115 and Arabidopsis thaliana BLAST annotation, and; (iii) a direct string search using the transcript,  
116 gene, or contig identifiers. To distinguish this set of predicted genes and transcripts from  
117 previously published 'MLOC\_' and HORVU identifiers, genes were prefixed as 'BART1\_0-  
118 u00000' for the unpadding or 'BART1\_0-p00000' for the padded QUASI version, with  
119 BART1\_0-p00000.000 representing the individual transcript number. The RNA-seq TPM  
120 values are shown in interactive stacked bar plots produced with plotly R libraries  
121 (<https://plotly.com/r/>) and the TPM values are also available as a text file for each gene. The  
122 exon structures of the transcripts for each gene are shown in graphical form, and links to the  
123 transcripts themselves provides access to the transcript sequences in FASTA format. Each  
124 transcript has also been compared to the published set of predicted genes (HORVUs) to provide  
125 backwards compatibility.

126

### 127 **GO annotation**

128 Transcript sequences were translated to protein sequences using TransDecoder  
129 (<https://github.com/TransDecoder/TransDecoder/wiki>). Gene Ontology (GO) annotation was  
130 then determined by running all 60,444 genes in BaRTv1.0 through Protein ANnotation with Z-  
131 score (PANNZER) (30. Koskinen et al., 2015). GO annotations were based on predicted  
132 proteins with ORF >100 amino acids and orthologues found in the Uniprot database. Output  
133 annotations were placed in a lookup table with text descriptions about protein functionality.

134

### 135 **Data Records**

136 BaRTv1.0 and BaRTv1.0 – QUASI are available as .fasta and .GFF files and can be downloaded  
137 from <https://ics.hutton.ac.uk/barleyrtd-new/downloads.html>. An additional version of the RTD  
138 is available in the Zenodo repository (<http://doi.org/10.5281/zenodo.3360434>).

139 The results matrix containing all the TPM values across all 843 samples for all 177,240  
140 BaRTv1.0 transcripts can be downloaded directly along with the metadata file from  
141 <https://ics.hutton.ac.uk/eorna/download.html>. An additional version of the results matrix and  
142 metadata file is available in the Zenodo repository (<http://doi.org/10.5281/zenodo.4286079>). To  
143 develop the plots and create the transcript abundance values (TPMs) publicly available  
144 sequences from the Sequence Read Archive (SRA) or European Nucleotide Archive (ENA)  
145 were used (accession numbers: PRJEB13621; PRJEB18276; PRJNA324116; PRJEB12540;  
146 PRJEB8748; PRJNA275710; PRJNA430281; PRJNA378582; PRJNA378723; PRJNA439267;  
147 PRJNA396950; PRJDB4754; PRJNA428086; PRJEB21740; PRJEB25969; PRJNA378334;  
148 PRJNA315041; PRJNA294716; PRJEB14349; PRJEB32063; PRJEB19243; PRJNA558196.  
149 Metadata on these datasets can be found in Supplementary Tables 1 and 2.

150

## 151 **Technical Validation**

### 152 **BaRTv1.0 database and expression plots.**

153 The BaRTv1.0 reference transcript dataset consists of 60,444 genes and 177,240 transcripts  
154 mapped to the cv. Morex pseudomolecules. To access the barley reference transcript dataset a  
155 public database and website front-end were constructed to allow researchers to download the  
156 reference transcript dataset and interrogate the data via a BLAST search, keyword search or  
157 string search using the BaRT or HORVU gene/transcript identifiers  
158 (<https://ics.hutton.ac.uk/barleyrtd/index.html>) (19). The transcripts are arranged as gene models  
159 and viewed through GBrowse. Transcript sequences are given in FASTA format and  
160 homologies of the longest transcripts are compared to Arabidopsis, Rice and Brachypodium.  
161 Until now, Salmon calculated TPM values for each gene across 16 different  
162 tissues/developmental stages in both graphic and tabular formats is presented. Since the initial  
163 publication, the BaRTv1.0 database has continued to evolve and we have established Gene  
164 Ontology (GO) annotation for 26,794 genes using Protein ANnotation with Z-score  
165 (PANNZER) (30. Koskinen et al., 2015) with text descriptions about protein functionality and  
166 provided a lookup table for download.

167

### 168 **EoRNA database - Quantification of multiple RNA-seq samples and expression plots.**

169 Establishing BaRTv1.0 has facilitated the precise quantification of RNA transcript abundance  
170 from any barley short-read RNA-seq dataset. We used BaRTv1.0 to quantify transcript  
171 abundance and diversity observed in a collection of 22 Illumina short-read RNA-seq  
172 experiments, 18 of which were obtained from the short-read archive (SRA) and the remainder  
173 produced in-house. Each RNA-seq experiment was given a label that contained the letter E  
174 (referring to external datasets) followed by a number or the letter I (internal datasets) followed  
175 by a number. The datasets contained a total of 843 samples and 3,762 Gbp of expressed  
176 sequences. They come from both barley landraces and cultivars, an array of organs and tissues  
177 at different developmental stages, and plants/seedlings grown under a range of biotic and abiotic  
178 stresses (Supplementary Table S1 and S2). Most RNA-seq datasets consisted of paired-end  
179 reads (90 - 150 bp in length) and were produced using Illumina HiSeq 2000, 2500, 4000 or  
180 HiSeq X instruments. Exceptions were the dataset from Golden Promise anthers and meiocytes,  
181 which contained over 2 billion paired end 35-76 bp reads. The raw RNA-seq data from all  
182 samples was trimmed and adapters removed using Trimmomatic and quality controlled using  
183 FastQC. TPM values were calculated individually for all 843 RNA-seq samples using Salmon  
184 (version Salmon-0.8.2) using BaRTv1.0-QUASI, a 'padded' version of BaRTv1.0 which has  
185 been shown to improve transcript quantification, as the reference transcript dataset (19.  
186 Rapazote-Flores et al., 2019). As BaRTv1.0 was assembled using the cv. Morex reference  
187 genome, we first assessed the mapping rates from all samples, including those from other  
188 genotypes. The Morex samples showed an average mapping rate of 94.39% (SD 8.18%) while  
189 the remaining samples, which consisted of 60 different barley genotypes showed a slightly  
190 reduced mapping rate of 92.32% (SD 4.93%) (Supplementary Table 3).

191 Salmon estimates the relative abundance of different transcript isoforms in the form of  
192 transcripts per million (TPM), a commonly used normalization method computed using the  
193 library size, number of reads and the effective length of the transcript. (20, 21). The EoRNA  
194 data provides an opportunity to examine the effect of the normalisation procedure across many  
195 diverse samples. Regression analyses was used to explore the raw read counts and different  
196 versions of normalised counts by library size and effective length of the transcript. Good  
197 normalisation procedures will remove most of the dependency on these variables such that the  
198 output of regression analysis represented by the R-square value (which measures the percentage  
199 of variation accounted for) can be used to compare different normalisations. Here, an R-square  
200 value closer to zero indicates effective normalisation. For efficient calculation, we first reduced  
201 the number of transcripts by selecting those which had non-zero values in at least 80% of the  
202 samples. This left 32739 transcripts over the 843 samples and gave 27,598,977 values to study  
203 how different normalisation approaches accounted for variation between experiments.  
204 Regression analysis was used first to explore the relationship between raw read counts by library



205 size and length of the transcript, which gave an adjusted R-squared value of 1.28% indicating  
206 low predictive value within the dataset. Transposing variables to a log-scale increased the R-  
207 square to 10.68%, which suggested a far stronger predictive value on this scale and shows that  
208 a large amount of variation in the raw counts can be removed by log-transforming. Replacing  
209 the log counts with normalised data using Salmon's effective transcript length, which corrects  
210 for transcript length bias (20), reduced the adjusted R-square value to 0.09%. This compared to  
211 normalisation by RPKM (Reads Per Kilobase per Million and normalizes the raw read count by  
212 transcript length and sequencing depth) (adjusted R-square of 0.57%) or TPMs calculated by  
213 transcript length alone (adjusted R-square of 0.62%). In summary, the normalised TPM outputs  
214 from Salmon using an effective transcript length reduced variability such that most of the  
215 dependency on library size and transcript length was removed (Supplementary data 1;  
216 Supplementary Table 4).

217 The normalised output TPM values from Salmon were collated and plotted using plotly R  
218 libraries (<https://plotly.com/r/>) to allow quick subjective and interactive comparisons in  
219 transcript abundance levels between the samples. The TPM values for each gene/plot are also  
220 given as a text file for download. We chose to plot the graphs as the TPM values without log  
221 scaling, to show the additive changes between the samples and replicates.  
222

### 223 Expression plot utility

224 Stacked bar graph plots display the TPM values calculated by Salmon for all 60,444 genes in  
225 the database for all 843 samples, representing over 50 million plot points. The x-axis displays  
226 the 843 samples versus the y-axis which displays transcript abundance in each sample as TPM  
227 values (Figure 1). Each individual sample bar graph stacks the TPM values contributed by each  
228 gene transcript to permit simple visualisation of the differences in transcript abundances  
229 between different samples and helps identify the predominant transcript(s) for that gene. Each  
230 plot may be scanned interactively to activate a label that gives information on the RNA-seq  
231 experiment, sample run number, tissue and treatment for that sample (from the metadata table,  
232 Supplementary Table 2). Users can zoom in to focus on individual experiment and sample plots.  
233 Without processing the data or assigning any statistical significance to the graphs, the results  
234 presented allow the researcher to determine whether their gene(s) of interest are expressed in  
235 the different experiments and among samples within an experiment. Large changes in TPM  
236 abundances were observed between the samples for many genes. For example, BaRT1\_u-31819  
237 showed altered gene expression in the root meristematic zone compared to the root elongation  
238 and maturation zones in the E1 dataset, which is further supported by expression in the root  
239 tissue in the I1 dataset (Figure 1).  
240

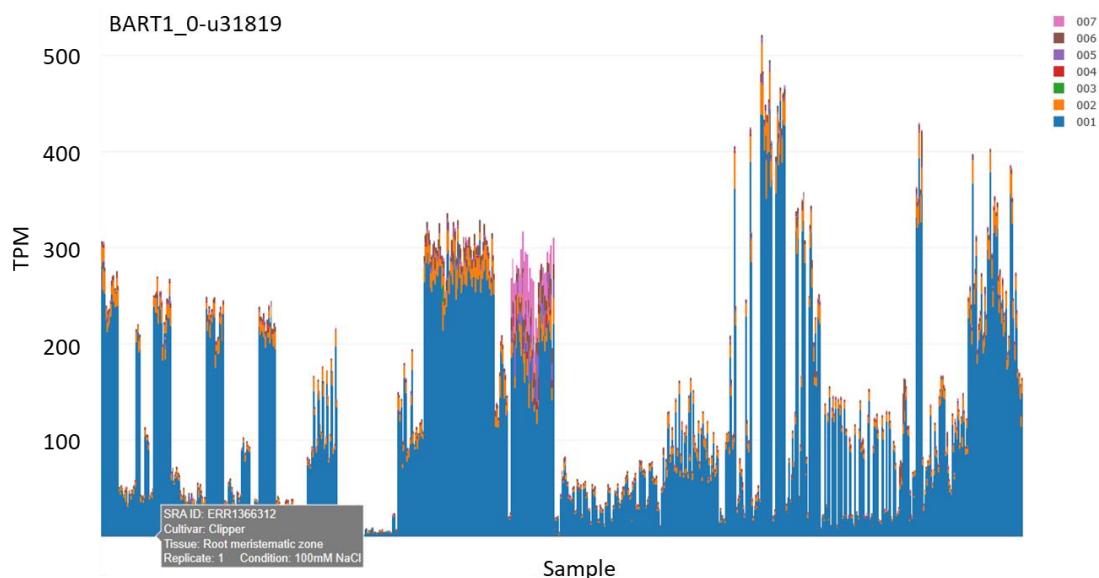

241 Figure 1. Variable expression between RNA-seq samples. The plot represents transcript  
242 abundances as transcripts per million (TPM) across 843 samples for BaRT1\_0-u31919  
243

244 (similarity to a small nuclear ribonucleoprotein family protein). Different colours represent  
245 different transcripts for that gene. Scanning over the plot gives a label describing cultivar, tissue,  
246 experimental condition (if available), replicate number and the short-read archive sequencing  
247 read number.

248

### 249 Tissue specific expression

250 The experimental panel of 22 RNA-seq datasets were from a broad range of cultivars, tissues,  
251 organs and biotic and abiotic conditions. The interactive plots enable the user to quickly identify  
252 potential candidate genes that show a high degree of tissue specificity. For example, BART1\_0-  
253 u49225 (with similarity to a UDP-Glycosyltransferase superfamily protein) was specifically  
254 and highly expressed to over 1,000 TPM in developing grain 15 days post anthesis (I1) and in  
255 developing barley spikes that contain developing grain (E20). Expression was segregating in  
256 hulless barley grain in recombinant inbred lines that were used to assess glucan content (E10).  
257 (Figure 2A). BART1\_0-u14427 was highly abundant only in tissues subjected to low  
258 temperature stress (E2 and I2) (Figure 2B) and BART1\_0-u50915 is one of a number of barley  
259 Pathogenesis-related 1 protein genes that was induced to over 10,000 TPM in response to  
260 *Cochliobolus sativus* (E19) and *Fusarium graminearum* (E20) (Figure 2C).

261

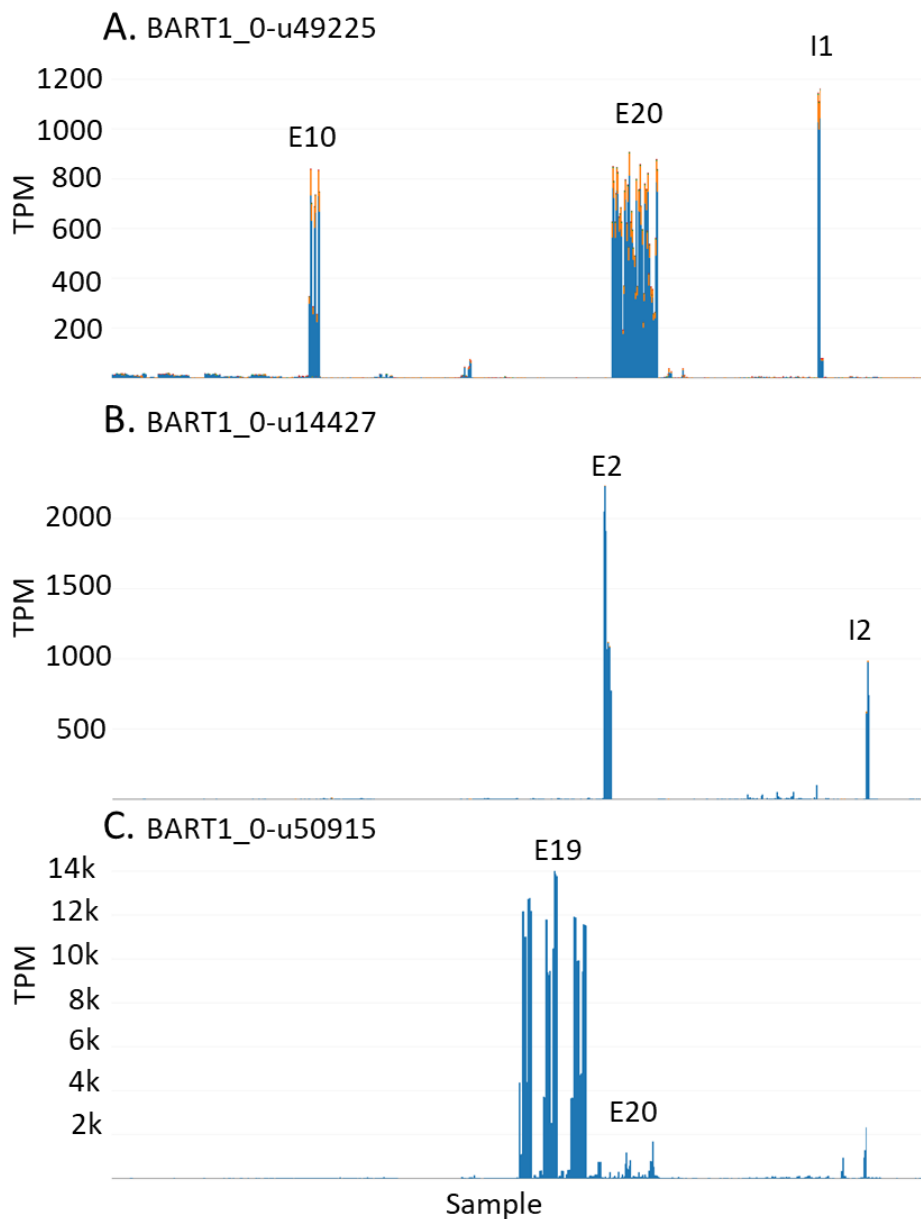

262

263 Figure 2. Tissue and condition specific expression. A. BART1\_0-u49225 specific expression in  
264 developing grain tissue used in experimental RNA-seq datasets E10, E20 and I1. B. BART1\_0-  
265 u14427 specific expression in low temperature stress RNA-seq datasets E2 and I2. C.  
266 BART1\_0-u50915 specific expression in response to pathogen RNA-seq datasets E19 and E20.  
267

### 268 Confirmatory expression

269 Interactive plots may be used to investigate the expression of genes that have been previously  
270 studied in a limited number of tissues/cultivars or using a different expression platform and  
271 consequently expands expression analysis across the range of tissues that are currently in  
272 EoRNA. For example, we previously described the expression of INTERMEDIUM-C  
273 (BART1\_0-u26546; HORVU4Hr1G007040), a modifier of lateral spikelet fertility in barley  
274 and an ortholog of the maize domestication gene TEOSINTE BRANCHED 1. Microarray  
275 analysis of 15 tissues showed that transcript abundance was low with greatest expression in the  
276 developing inflorescence (31). The RNA-seq panel here confirmed low abundances for this  
277 gene across all the samples (<7.5 TPM), with greatest expression in shoot apices (E7); apical  
278 meristems (E13) and developing spikes at the awn primordium stage (E14) (Figure 3).  
279

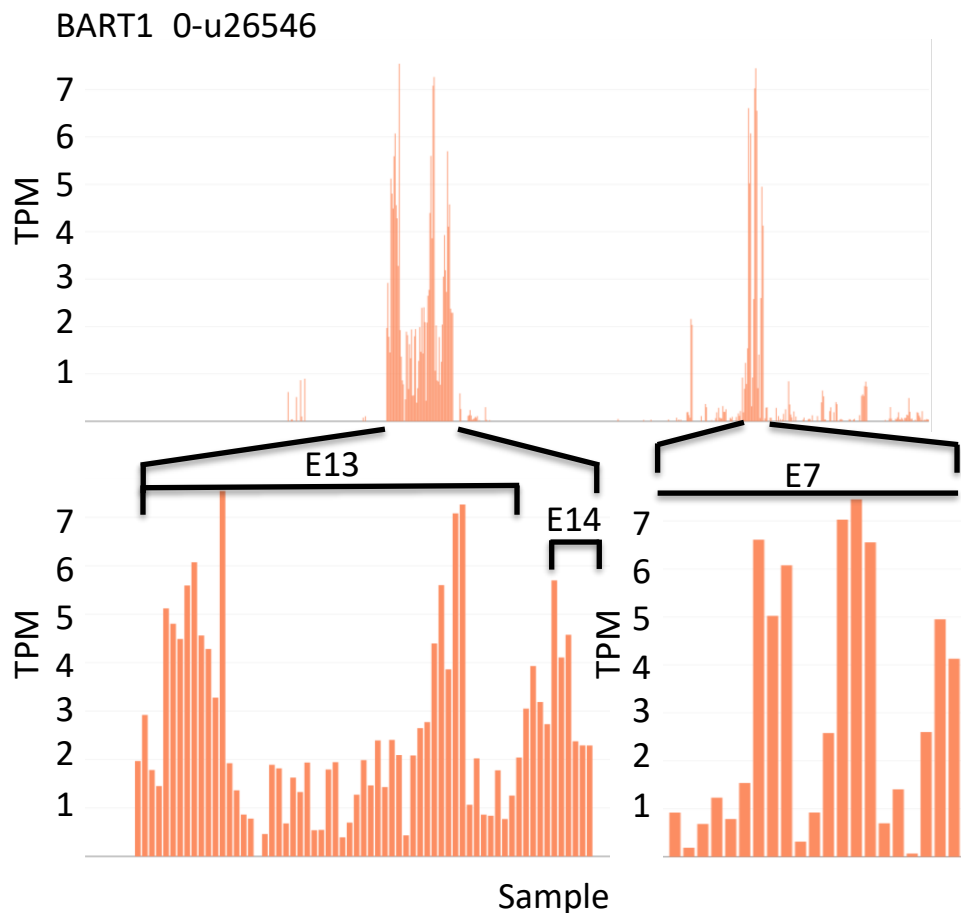

280 Figure 3. Abundance levels of INTERMEDIUM-C (HvTB1) (BART1\_0-u26546) across the 22  
281 RNA-seq experiments. E7 – Photoperiod response RNA-seq dataset from shoot apex; E13 - Six  
282 Rowed - VRS3 RNA-seq dataset from apical meristems; E14 - Floret development RNA-seq  
283 dataset from developing spikes at awn primordium stage. Abundances given in Transcripts per  
284 million (TPM). The bottom Panel shows zoomed-in regional views.  
285  
286

### 287 Segregation expression

288 The RNA-seq datasets consist of several experiments that contain mutant lines targeted to  
289 specific genes, recombinant inbred lines (RILs) and near isogenic lines (NILs). The expression  
290 of genes found at quantitative trait loci, or through genome-wide association studies show  
291 changes in gene expression at these loci between the parents and in the population. The seed

292 longevity experiment (E17) illustrated gene expression changes in RILs and NILs from the  
293 landraces L94 (short-lived seeds) and Cebada capa (long-lived seeds). QTL analysis identified  
294 three QTLs on 1H (SLQ1.1 to 1.3) and a single QTL on 2H (SLQ2). Gene expression analysis  
295 identified differentially expressed genes positioned within the SLQ1 and 2 regions (32). Using  
296 the interactive plots confirmed the barley population expression pattern of these differentially  
297 expressed genes. The plots show changes among the parental types retained in the recombinant  
298 inbred and near isogenic lines (Figure 4). For example, BART1\_0-u01011(MLOC\_61374) is  
299 positioned within SLQ1.1 and showed low expression in Cebada capa and the NILs at SLQ1.1  
300 (Figure 4A) and BART1\_0-u15865 (MLOC\_73587) showed expression in Cebada capa that  
301 was absent in L94 and found expressed in SLQ2 NILs Figure 4B). The transcript abundances  
302 of these genes were shown in the context of the remaining 21 RNA-seq experiments tested.  
303

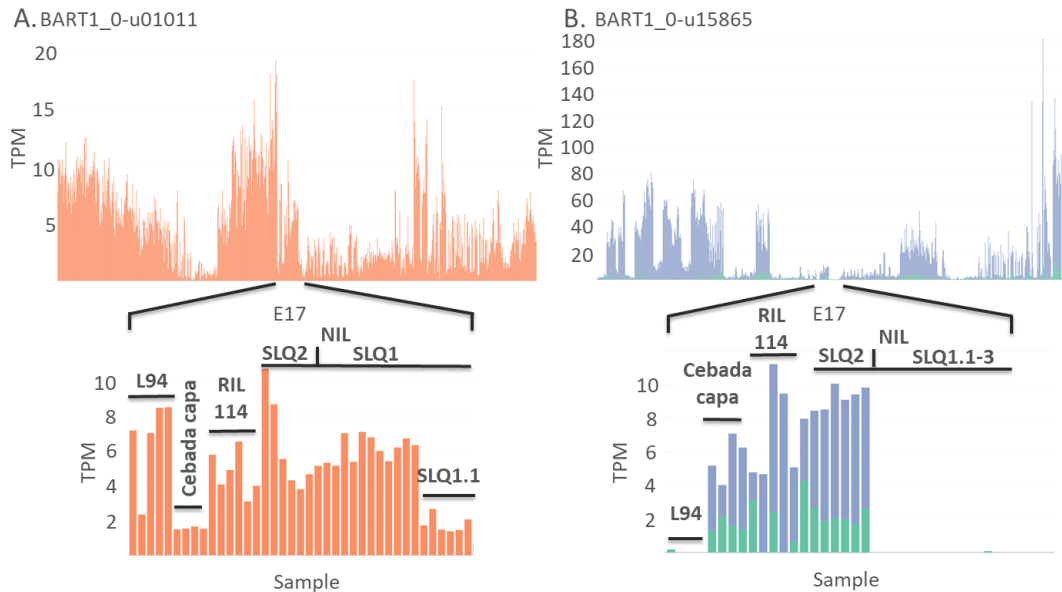

304 Figure 4. Abundance levels of differentially expressed genes at quantitative trait loci. Detailed  
305 abundances (TPM) are shown for a seed longevity experiment (E17) between parents (L94 and  
306 Cebada capa), recombinant inbred lines (RIL114) and near isogenic lines to the L94 parent and  
307 showing variation at QTLs SLQ1 and SLQ1-3. A. BART1\_0-u01011(MLOC\_61374) is located  
308 at SLQ1.1 and B. BART1\_0-u15865 (MLOC\_73587) is located at SLQ2.  
309

310

### 311 Gene targeted mutations

312 Unless a mutation either specifically impacts sequences governing the expression of a target  
313 gene, or removes all or part of a gene by deletion, then the outcome of a mutation on observed  
314 transcript abundance may vary substantially, resulting in loss, reduced, maintained or increased  
315 transcript levels. The interactive plots allow researchers to observe rapidly and intuitively the  
316 effect of a mutation on the expression of a target gene and, based on the experimental design,  
317 the possible trans-acting effects on the expression of other genes. For example, experiment E19  
318 consists of a series of disease resistance tests on cv. Morex and a gamma irradiation induced  
319 Morex mutant (14-40) selected for its susceptibility to spot blotch (*Bipolaris sorokiniana*). The  
320 expression of BART1\_0-u18601; HORVU3Hr1G019920 (glycine-rich protein) and BART1\_0-  
321 u41161; HORVU5Hr1G120850 (similarity to a long-chain-fatty-acid—CoA ligase 1) were  
322 knocked out in the mutant, which is clearly observed in the interactive plots (33) (Figure 5).  
323

323



324

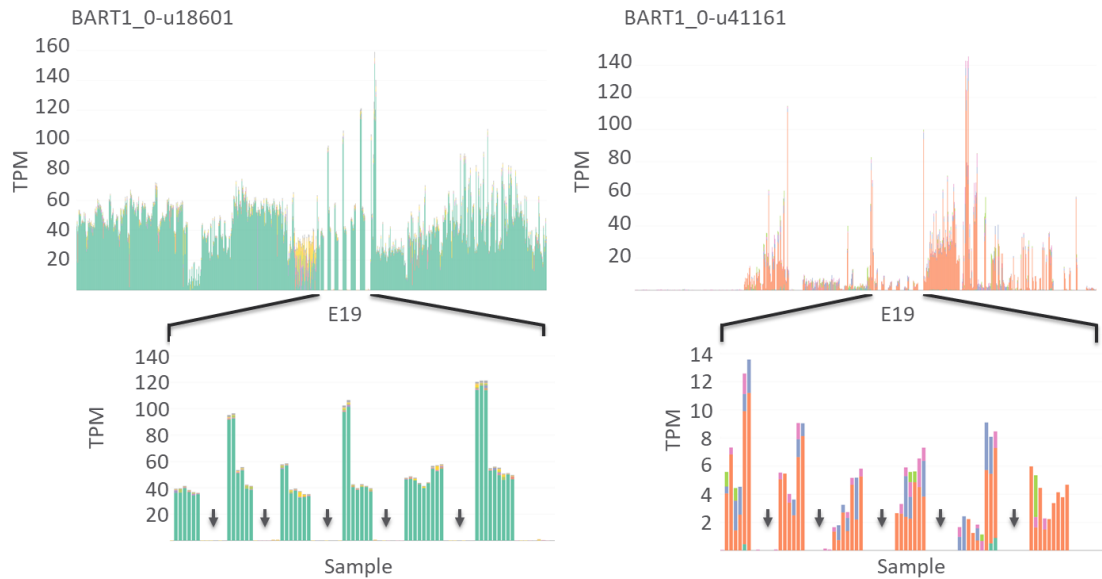

325

326

327 Figure 5. Expression knockout in a mutant background. The pattern of transcript abundances of  
328 two genes (BART1\_0-u18601 and BART1\_0-u4116) is shown across all the samples and given  
329 in Transcripts per million (TPM). Detailed transcript abundances are shown for the E19 RNA-  
330 seq dataset - RNA-seq of *Hordeum vulgare* inoculated with *Cochliobolus sativus*. The gaps  
331 arrowed between the expression in the wild type cv. Morex are multiple samples derived from  
332 the barley cv. Morex mutant 14-40, which shows disruption of expression.

333

334

### 335 **Transcript variation between cultivars.**

336 To create the BaRTv1.0 RTD, transcripts from multiple datasets from a range of tissues,  
337 treatments and cultivars were mapped to cv. Morex pseudomolecules to maximise read  
338 coverage support for genes and splice junctions (19). BaRTv1.0 is, therefore, a predominantly  
339 cv. Morex RTD. Nevertheless, transcripts that contain indels in other cultivars will be found in  
340 BaRTv1.0. Salmon quantifications of the 843 individual samples was able to identify and  
341 quantify cultivar specific transcripts. BaRT1\_u-06868 showed a selection of different  
342 transcripts due to genotype differences. Alignment with genomic sequence and the most highly  
343 abundant transcripts shows a small run of 4 GCAG repeats in one genotype compared to a run  
344 of 3 GCAG repeats in a different genotype. These genotype specific variant transcripts were  
345 observed across the range of cultivars used in the RNA-seq experiments. For example, the  
346 experimental dataset E1 shows two different cultivars cvs. Clipper and Sahara with two  
347 different main transcript variants, which is the result of the 4bp indel. Clipper shows use of the  
348 transcripts .001 and .002 while Sahara uses transcripts .005 and .006 (Figure 6). The  
349 transcriptome assemblies and quantifications using BaRTv1.0 shows that cultivar specific  
350 transcripts can be easily distinguished.

351

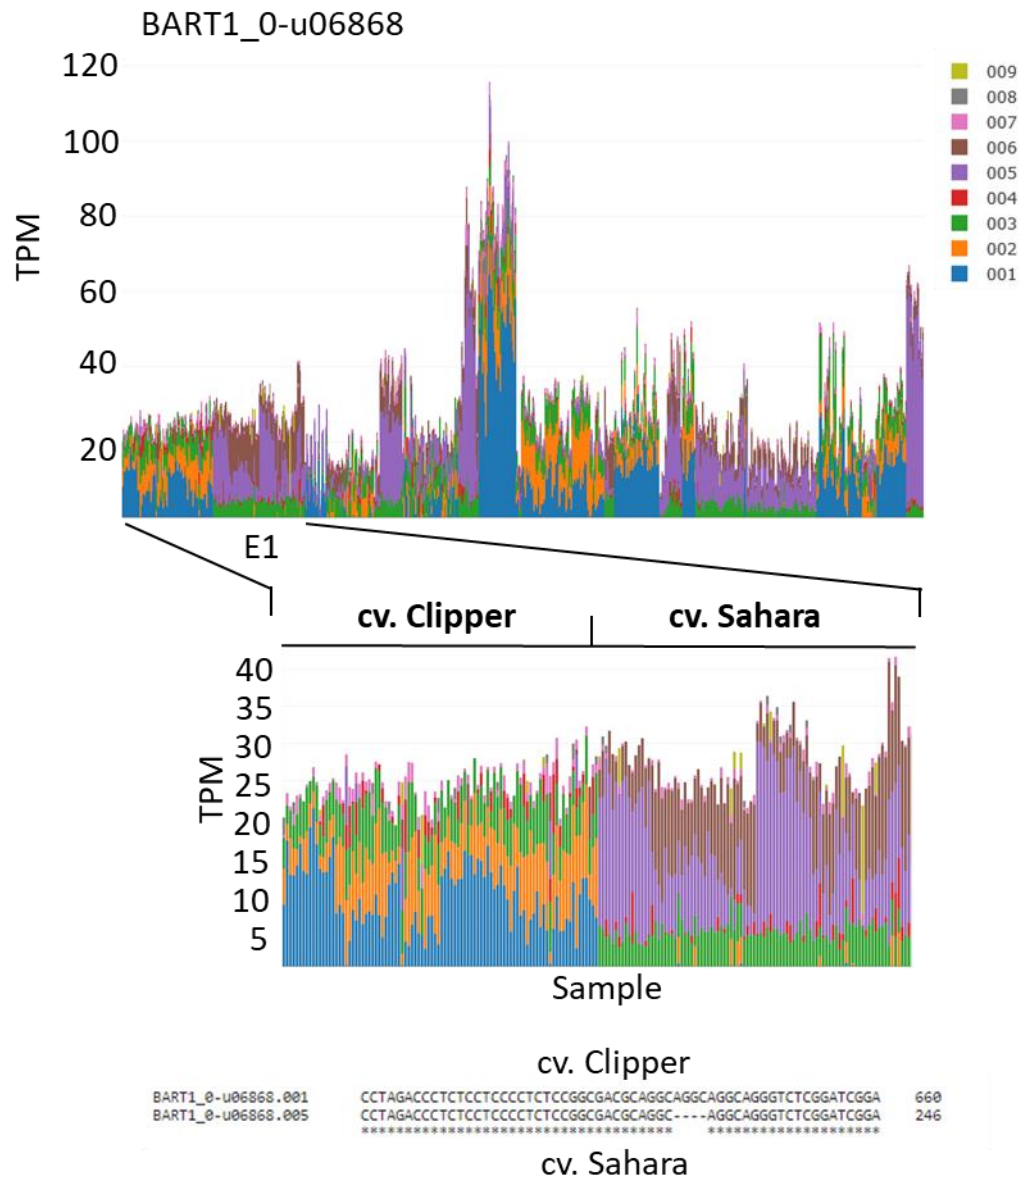

352  
353 Figure 6. Transcripts that represent allelic variants across barley cultivars. BaRT1\_u-06868  
354 shows transcripts .001 (blue) and .002 (orange in the cv. Clipper, while cv. Sahara shows  
355 transcripts .005 (purple) and .006 (brown). Sequence alignment between transcripts .001 and  
356 .005 shows the 4bp deletion in cv. Sahara found in transcript 005.

357  
358 Alternative splice site switching

359 Selection of alternative splice sites results in the formation of multiple alternative  
360 transcripts. The proportions of alternative transcripts may change in different tissues or as the  
361 result of a changing environment. Many of these changes require detailed analysis to determine  
362 significant changes in the amounts and proportions of the alternative transcripts. Nevertheless,  
363 the stacked bar graphs allow large changes in the abundance of alternative transcripts to be  
364 detected between samples. For example, BaRT1\_u-00022 was expressed across all tissues but  
365 in some samples an alternative transcript, BaRT1\_u-00022.001, shown in blue, predominated  
366 over BaRT1\_u-00022.003 shown in green (Figure 7A). The difference between the two  
367 transcripts was an alternative intron in the 3'UTR, which was retained in transcript .001 and  
368 spliced out in transcript .003. Comparison with the meta-data (Supplementary table 2) showed  
369 tissue specific abundance of transcript .001 in grain/caryopsis and germinating grain  
370 (coleoptiles) in the experimental datasets E8, E10, E17, I1 and I2. Comparison across the  
371 different experiments and replicates supports both the tissue and cultivar specific variation. For

372 example, the alternative .001 transcript was also observed in Golden Promise in datasets E11  
373 and I6. The plots also illustrate dynamic changes in alternative splicing in different tissues or  
374 because of different stresses. For example, BaRT1\_u-40919, which has similarity to a cold  
375 inducible Zinc finger-containing glycine-rich RNA-binding protein, shows switching of  
376 transcript .001 to .005 during cold stress, which is the result of the selection of an alternative  
377 intron (I2) (Figure 7B). In both these cases, the reading frame of the protein is unaffected but  
378 extends the length of the 3'UTR in the transcripts where the intron is retained. These examples  
379 highlight transcript variation because of genotypic differences and dynamic alternative splicing  
380 as a result of tissue/organ specific splicing or changing environmental conditions.  
381

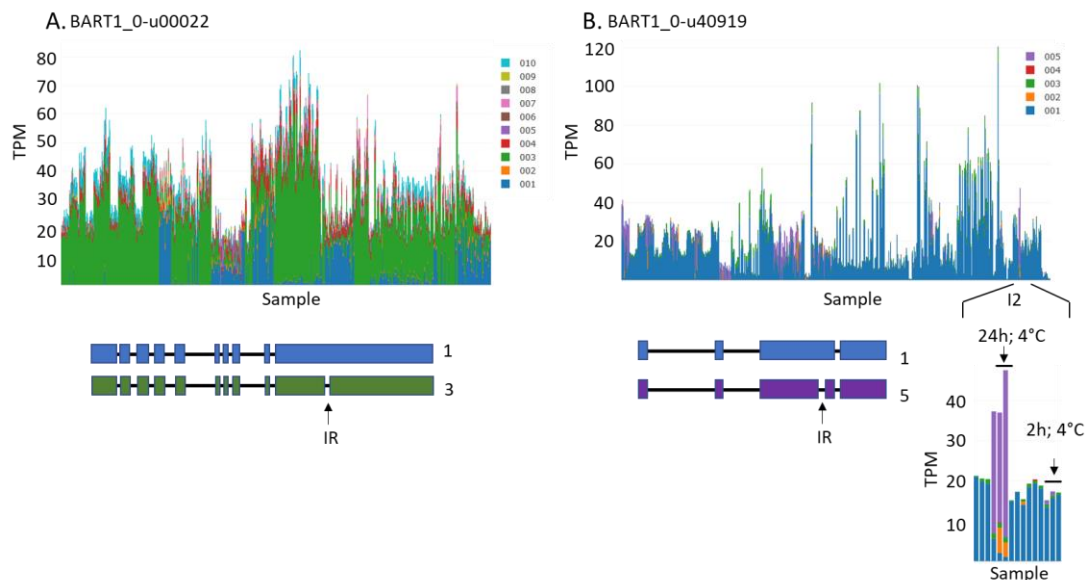

382  
383 Figure 7. Alternative transcripts across the RNA-seq experiments. Different colours on the  
384 stacked bar graph indicate different gene transcripts produced through alternative splicing.  
385 Expression levels given in TPM – transcripts per million. A. BaRT1\_u-00022 shows two main  
386 transcripts in blue (.001) and green (.003). B. BaRT1\_u-40919 shows transcript switching in  
387 the cold response experimental set I2. Alternative splicing leads to switching from transcript  
388 .001 (blue) to .005 (purple in the cold. Gene models for each gene are presented and the position  
389 of the retained intron (IR) shown.

## 390 Discussion

391 Comprehensive reference transcript datasets are required for rapid, accurate quantification of  
392 gene expression using RNA-seq. Quantification at the transcript level further allows robust and  
393 routine analysis of alternative splicing (34, 35, 36). Here we used the barley reference transcript  
394 dataset, BaRTv1.0, to demonstrate the value and utility of a barley RTD for gene expression  
395 studies and AS analysis. We used BaRTv1.0 to quantify transcripts in 22 RNA-seq datasets,  
396 covering multiple genotypes, tissues and different abiotic and biotic stress conditions.  
397 BaRTv1.0 was assembled against the cv. Morex genome, but in this analysis we used RNA-seq  
398 data from a wide-range of cultivars and lines and found that mapping rates in all cultivars  
399 remained high (94.39% in cv. Morex compared to 92.32% in the other cultivars). We found  
400 expression and alternative splicing abundances varied between cultivars, tissues/organs and  
401 between environmental changes and stresses. The data is presented in a single accessible  
402 database that gives visual and numerical access to expression data for barley genes across all  
403 the tested barley samples (<https://ics.hutton.ac.uk/eorna/index.html>).

404 The importance of comparing between sample sets allows researchers to answer how their gene  
405 of interest is expressed in other tissues or under what condition. RNA-seq expression results are  
406 displayed in graphical form, simply as TPM values directly from the outputs of Salmon, without  
407 considering batch differences that may occur between samples, among experimental studies and  
408 does not assign statistical significances. We recognise that to include statistical analysis and  
409

410 thereby define significant DE or DAS would require complete control over experimental design,  
411 sample preparation and sequencing analysis. These interactive plots, therefore, simply permit  
412 rapid visual assessment of expression levels of selected genes of interest. TPM values are  
413 accessible and allow users to perform their own DE and DAS analysis, such as found in the 3D  
414 RNA-seq interactive graphical user interface (37) or by comparing multiple RNA-seq datasets  
415 by meta-analysis methods (23, 24, 25, 26). The results will enable the construction of  
416 transcript/co-expression/regulatory networks and support the development of proteomic  
417 resources for barley.

418 We did not carry out validation experiments using alternative methods, such as RT-PCR, as we  
419 do not have access to all the RNA samples used to produce the RNA-seq data. However,  
420 multiple RNA-seq samples consisted of similar tissues or conditions that showed similar gene  
421 expression responses. This was particularly noticeable in the genes that showed tissue or  
422 condition specific expression, such as those from developing grain tissue, low temperature  
423 stress and in response to pathogens (Figure 2). In addition, we have previously performed RT-  
424 PCR alternative splicing validation experiments on 5 of the tissues in the I1 RNA-seq  
425 experiment and found a strong correlation ( $r^2=0.83$ ) with the alternatively spliced transcript  
426 proportions of RNA-seq, supporting the ability of the RNA-seq data to accurately detect  
427 changes in AS (19).

428 Output expression values such as TPM from RNA-seq experiments are under continuous  
429 discussion and development and may be affected by sequencing protocols and experimental  
430 conditions (38). Here, TPM values were calculated using Salmon to allow transcript abundances  
431 to be compared between samples. To check that the TPM values were representative as  
432 expression values, we determined variability across all the samples using linear regression  
433 analyses and found that the output from Salmon showed the lowest variability and therefore  
434 provided the best normalisation across all the samples. Some of the downloaded RNA-seq  
435 datasets revealed experimental samples that had extremely low or high read depths and poor  
436 mapping rates that after normalisation suggested abnormally high TPM values. These were not  
437 included in our analyses (data not shown).

438 We have given examples of genes that clearly illustrate the wide utility offered by access to  
439 datasets from multiple RNA-seq experiments. The plots identified genes that were uniquely  
440 expressed in a cultivar, tissue or condition specific manner. Considering the range of samples  
441 displayed, the unique abundances in specific samples support the potential value of these genes  
442 as expression 'biomarkers' for that tissue or condition. There were other uniquely expressed  
443 genes found in the interactive plots and only three were reported here to illustrate utility:-  
444 BART1\_0-u49225, with similarity to a UDP-Glycosyltransferase family member, was found  
445 specifically expressed in developing grain; BART1\_0-u14427, with similarity to late  
446 embryogenesis abundant (LEA) proteins was induced after 24 h at low temperature; and  
447 BART1\_0-u50915, which is one of a number of barley Pathogenesis-related 1 protein genes  
448 that are established pathogen responsive genes (Figure 2). The plots also identified cis- and  
449 trans-acting induced expression (or loss of expression) of genes that segregate among near  
450 isogenic lines or mutant populations (Figure 4 and 5) and cultivar specific transcripts (Figure  
451 6). The expression characteristics may help identify, retain or exclude candidate genes from  
452 involvement in a given biological process, form the basis for the development of tissue specific  
453 reporter genes, validate observed expression QTL or explore the genomic landscape of actively  
454 expressed genes.

455 Barley exhibits a high frequency of alternative splicing that impacts development and  
456 adaptation to the surrounding daily and seasonal environment. The plots revealed genes that  
457 change their splice site selection patterns in different tissues and organs and, in some cases,  
458 show switching in splice site selection as a response to stress (Figure 7). In addition, genotypic  
459 differences in diverse barley cultivars and landraces can lead to considerable changes in the  
460 gene expression. Single nucleotide polymorphisms or insertion/deletions at important splice  
461 sites and in splicing regulatory elements can affect the abundance of transcript isoforms and  
462 alter translational reading frames or transcript stability. An example here shows how a 4 bp  
463 deletion in cv. Sahara led to selection of two different transcripts in the BaRT RTD by cv.

464 Clipper. The functional impact of genetic variations on splicing diversity will impact phenotypic  
465 diversity and cultivar adaptation to local environments.  
466 BaRT is under constant incremental improvement. The next release of BaRT is being developed  
467 by incorporating new short and, importantly, long-read RNA-seq datasets. The need to capture  
468 the diversity of different transcripts from a wider range of genotypes will further lead to the  
469 development of a pan-transcriptome barley RTD to match a barley pan-genome sequence (5,  
470 39). This will ultimately result in recalculation of the TPM values. In addition, new RNA-seq  
471 experiments are constantly submitted to the sequence archives. We are currently developing a  
472 pipeline that allows automated addition of newly deposited RNA-seq datasets associated with  
473 subsequent quantification using the latest RTD and updated releases of EoRNA. This will  
474 continually expand the utility of the interactive plots and provide straightforward and open  
475 access of RNA-seq data to researchers, adding considerable value to the stand-alone RNA-seq  
476 datasets. In summary, the BaRT RTD is part of a unique pipeline that facilitates fast robust  
477 routine quantification of barley gene transcripts, visualised in EoRNA through interactive plots  
478 linked to gene models and metadata, ultimately leading to robust and consistent estimation of  
479 barley gene expression and alternative splicing across multiple samples.

## 480 **Usage Notes**

482 The expression data is most easily accessible through an intuitive and easy to use Web interface:  
483 <https://ics.hutton.ac.uk/eorna/index.html>.

484 Gene and transcript sequence information and expression data can be accessed through  
485 Homology Searches, Annotation Searches or thorough BLAST nucleotide or protein sequences.  
486 Barley Pseudomolecule gene names (HORVU numbers) can be easily translated to BART  
487 identifiers.

488 The plots showing individual gene expression across all the samples has a link under the plot to  
489 a text delimited file with all the expression (TPMs), tissue, condition, cultivar and replicate. The  
490 whole dataset describing expression of all the BaRT genes can downloaded as a single txt  
491 delimited file. This is further stored at <http://doi.org/10.5281/zenodo.4286079>.

492

## 493 **Acknowledgements**

494 The authors wish to acknowledge critical reading by Peter E. Hedley at The James Hutton  
495 Institute. This research was supported and developed by Scottish Government Rural and  
496 Environment Science and Analytical Services division (RESAS) and funding from the  
497 Biotechnology and Biological Sciences Research Council (BBSRC) (BB/I00663X/1: A draft  
498 sequence of the barley genome) and ERC project 669182 'SHUFFLE' to RW.  
499

## 500 **Author contributions**

501 PR-F and MB downloaded and assembled the RNA-seq datasets. LM established the searchable  
502 database. LM, MB, CS, and C-DM conceived and designed the interactive plots for the  
503 database. PR-F, MB, LM, CS, and C-DM performed the analysis of the RNA-seq data and  
504 outputs. CS, LM, MB, C-DM and RW wrote the paper.  
505

## 506 **Competing interests**

507 The authors declare that they have no competing interests.  
508



## 509 References

- 510 1. Dawson, I.K. *et al.* Barley: a translational model for adaptation to climate change. *New*  
511 *Phytol.* **206**, 913-931 (2015).
- 512 2. Russell, J. *et al.* Exome sequencing of geographically diverse barley landraces and wild  
513 relatives gives insights into environmental adaptation. *Nat Genet.* **48**, 1024-1030 (2016).
- 514 3. Mascher, M. *et al.* A chromosome conformation capture ordered sequence of the barley  
515 genome. *Nature.* **544**: 427-433 (2017).
- 516 4. Hernandez, J., Meints, B. & Hayes, P. Introgression Breeding in Barley: Perspectives and  
517 Case Studies. *Front Plant Sci.* **11**, 761. (2020).
- 518 5. Gao, S. *et al.* Identifying barley pan-genome sequence anchors using genetic mapping and  
519 machine learning. *Theor Appl Genet.* **133**, 2535-2544 (2020).
- 520 6. Newton, A.C. *et al.* Crops that feed the world 4. Barley: a resilient crop? Strengths and  
521 weaknesses in the context of food security. *Food Sec.* **3**, 141 (2011).
- 522 7. Bian, J. *et al.* Transcriptional Dynamics of Grain Development in Barley (*Hordeum vulgare*  
523 L.). *Int J Mol Sci.* **20**, 962 (2019).
- 524 8. Janiak, A. *et al.* No Time to Waste: Transcriptome Study Reveals that Drought Tolerance in  
525 Barley May Be Attributed to Stressed-Like Expression Patterns that Exist before the Occurrence  
526 of Stress. *Front Plant Sci.* **8**, 2212 (2018).
- 527 9. Ren, P. *et al.* Molecular Mechanisms of Acclimatization to Phosphorus Starvation and  
528 Recovery Underlying Full-Length Transcriptome Profiling in Barley (*Hordeum vulgare* L.).  
529 *Front Plant Sci.* **9**, 500 (2018).
- 530 10. Ashoub, A., Müller, N., Jiménez-Gómez, J.M. & Brüggemann, W. Prominent alterations of  
531 wild barley leaf transcriptome in response to individual and combined drought acclimation and  
532 heat shock conditions. *Physiol Plant.* **163**, 18-29 (2018).
- 533 11. Kintlová, M., Blavet, N., Cegan, R. & Hobza, R. Transcriptome of barley under three  
534 different heavy metal stress reaction. *Genom Data.* **13**, 15-17 (2017).
- 535 12. Calixto, C.P.G., Simpson, C.G., Waugh, R. & Brown, J.W.S. Alternative Splicing of Barley  
536 Clock Genes in Response to Low Temperature. *PLoS One.* **11**, e0168028 (2016).
- 537 13. International Barley Sequencing Consortium (IBSC). A physical, genetic and functional  
538 sequence assembly of the barley genome. *Nature* **491**, 711–716. (2012).
- 539 14. Cantalapiedra, C.P., García-Pereira, M.J., Gracia, M.P., Igartua, E., Casas, A.M. &  
540 Contreras-Moreira, B. Large Differences in Gene Expression Responses to Drought and Heat  
541 Stress between Elite Barley Cultivar Scarlett and a Spanish Landrace. *Front Plant Sci.* **8**, 647  
542 (2017).
- 543 15. Hübner, S., Korol, A.B. & Schmid, K.J. RNA-Seq analysis identifies genes associated with  
544 differential reproductive success under drought-stress in accessions of wild barley *Hordeum*  
545 *spontaneum*. *BMC Plant Biol.* **5**, 134 (2015).
- 546 16. Panahi, B., Mohammadi, S.A., Ebrahimi Khaksefidi, R., Fallah Mehrabadi, J. & Ebrahimie,  
547 E. Genome-wide analysis of alternative splicing events in *Hordeum vulgare*: Highlighting  
548 retention of intron-based splicing and its possible function through network analysis. *FEBS Lett.*  
549 **589**, 3564-3575 (2015).
- 550 17. Zhang, Q., Zhang, X., Wang, S., Tan, C., Zhou, G. & Li, C. Involvement of Alternative  
551 Splicing in Barley Seed Germination. *PLoS One.* **11**, e0152824 (2016a).
- 552 18. Zhang, Q., Zhang, X., Pettolino, F., Zhou, G. & Li, C. Changes in cell wall polysaccharide  
553 composition, gene transcription and alternative splicing in germinating barley embryos. *J Plant*  
554 *Physiol.* **191**, 127-139 (2016b).
- 555 19. Rapazote-Flores, P. *et al.* BaRTv1.0: an improved barley reference transcript dataset to  
556 determine accurate changes in the barley transcriptome using RNA-seq. *BMC Genomics.* **20**,  
557 968 (2019).
- 558 20. Patro, R., Duggal, G., Love, M.I., Irizarry, R.A. & Kingsford, C. Salmon provides fast and  
559 bias-aware quantification of transcript expression. *Nat Methods.* **14**, 417-419 (2017).
- 560 21. Bray, N.L., Pimentel, H., Melsted, P. & Pachter L. Near-optimal probabilistic RNA-seq  
561 quantification. *Nat Biotechnol.* **34**, 525-527 (2016).

- 562 **22.** Wagner, G.P., Kin, K. & Lynch V.J. Measurement of mRNA abundance using RNA-seq  
563 data: RPKM measure is inconsistent among samples. *Theory Biosci* **131**, 281-285 (2012).
- 564 **23.** Rest, J.S., Wilkins, O., Yuan, W., Purugganan, M.D. & Gurevitch, J. Meta-analysis and  
565 meta-regression of transcriptomic responses to water stress in Arabidopsis. *Plant J* **85**, 548–560  
566 (2016).
- 567 **24.** Balan, B., Caruso, T. & Martinelli, F. Gaining Insight into Exclusive and Common  
568 Transcriptomic Features Linked with Biotic Stress Responses in Malus. *Front Plant Sci.* **8**, 1569  
569 (2017).
- 570 **25.** Balan, B., Marra, F.P., Caruso, T. & Martinelli, F. Transcriptomic responses to biotic  
571 stresses in Malus x domestica: a meta-analysis study. *Sci Rep.* **8**, 1970 (2018).
- 572 **26.** Benny, J., Pisciotta, A., Caruso, T. & Martinelli, F. Identification of key genes and its  
573 chromosome regions linked to drought responses in leaves across different crops through meta-  
574 analysis of RNA-Seq data. *BMC Plant Biol.* **19**, 194 (2019).
- 575 **27.** Bolger, A.M., Lohse, M. & Usadel, B. Trimmomatic: a flexible trimmer for Illumina  
576 sequence data. *Bioinformatics.* **30**, 2114-2120 (2014).
- 577 **28.** Ouyang, S. *et al.* The TIGR Rice Genome Annotation Resource: improvements and new  
578 features. *Nucleic Acids Res.* **35**(Database issue), D883-7 (2007).
- 579 **29.** Altschul, S.F, Gish, W., Miller W, Myers, E.W. & Lipman, D.J. Basic local alignment  
580 search tool. *J Mol Biol.* **215**, 403-410 (1990).
- 581 **30.** Koskinen, P., Törönen, P., Nokso-Koivisto, J. & Holm, L. PANNZER: high-throughput  
582 functional annotation of uncharacterized proteins in an error-prone environment.  
583 *Bioinformatics.* **31**: 1544-1552 (2015).
- 584 **31.** Ramsay, L. *et al.* INTERMEDIUM-C, a modifier of lateral spikelet fertility in barley, is an  
585 ortholog of the maize domestication gene TEOSINTE BRANCHED 1. *Nat Genet.* **43**, 169-172  
586 (2011).
- 587 **32.** Wozny, D., Kramer, K., Finkemeier, I., Acosta, I.F. & Koornneef, M. Genes for seed  
588 longevity in barley identified by genomic analysis on near isogenic lines. *Plant Cell Environ.*  
589 **41**, 1895-1911 (2018).
- 590 **33.** Haas, M., Mascher ,M., Castell-Miller, C. & Steffenson, B.J. RNA-seq reveals few  
591 differences in resistant and susceptible responses of barley to infection by the spot blotch  
592 pathogen *Bipolaris sorokiniana*. *BioRxiv.* doi: <https://doi.org/10.1101/384529> (2018).
- 593 **34.** Zhang, R. *et al.* A high-quality Arabidopsis transcriptome for accurate transcript-level  
594 analysis of alternative splicing. *Nucleic Acids Res.* **45**: 5061-5073 (2017).
- 595 **35.** Zhang, R. *et al.* AtRTD - a comprehensive reference transcript dataset resource for accurate  
596 quantification of transcript-specific expression in Arabidopsis thaliana. *New Phytol.* **208**, 96-  
597 101 (2015).
- 598 **36.** Calixto, C.P.G. *et al.* Rapid and Dynamic Alternative Splicing Impacts the Arabidopsis Cold  
599 Response Transcriptome. *Plant Cell.* , 1424-1444 (2018).
- 600 **37.** Guo, W. *et al.* 3D RNA-seq - a powerful and flexible tool for rapid and accurate differential  
601 expression and alternative splicing analysis of RNA-seq data for biologists. *bioRxiv.*  
602 <https://doi.org/10.1101/656686> (2019).
- 603 **38.** Zhao, S., Ye, Z. & Stanton, R. Misuse of RPKM or TPM normalization when comparing  
604 across samples and sequencing protocols. *RNA.* **26**, 903-909 (2020).
- 605 **39.** Monat, C., Schreiber, M., Stein, N. & Mascher, M. Prospects of pan-genomics in barley.  
606 *Theor Appl Genet.* **132**, 785-796 (2019).
